# Supplementary material for: Identification of tumorigenicity-associated genes in osteosarcoma cell lines based on bioinformatic analysis and experimental validation
Source: PubMed Central journal article supplement (PMC7150450; doi:10.7150/jca.37393), 2020-03-26

1 **Supplementary Material**

2 **Table S1.** Differentially expressed genes.

3 **Figure S1.** PPI analysis of lowly expressed genes in highly tumorigenic osteosarcoma  
4 cell lines.

5 **Figure S2.** PPI analysis of highly expressed genes in highly tumorigenic  
6 osteosarcoma cell lines.

7

# Figure S1

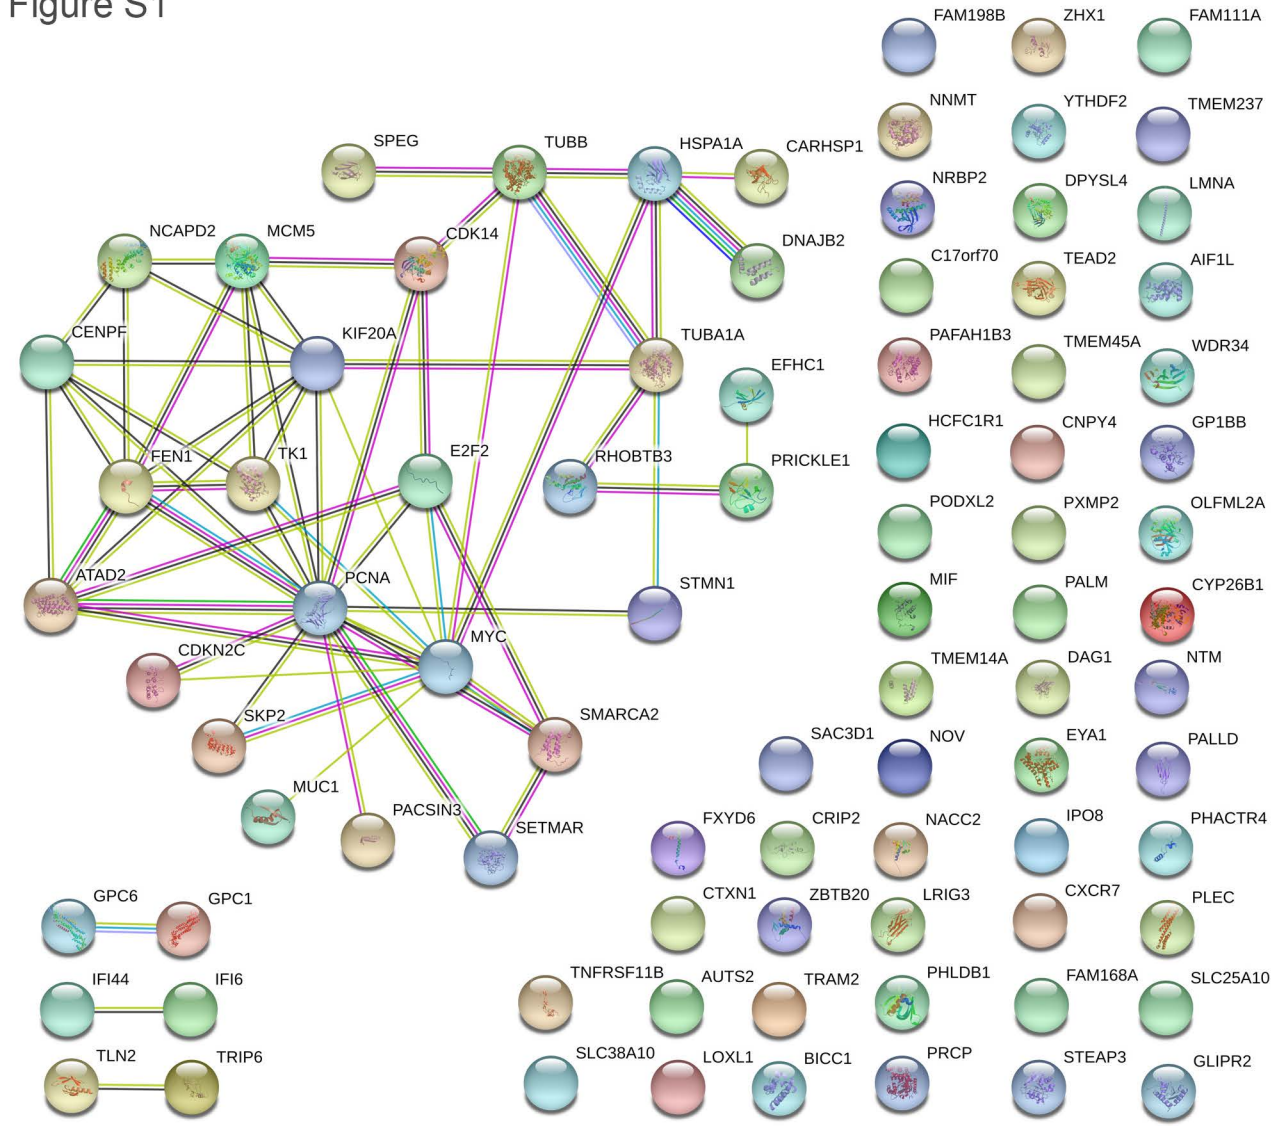

Figure S2

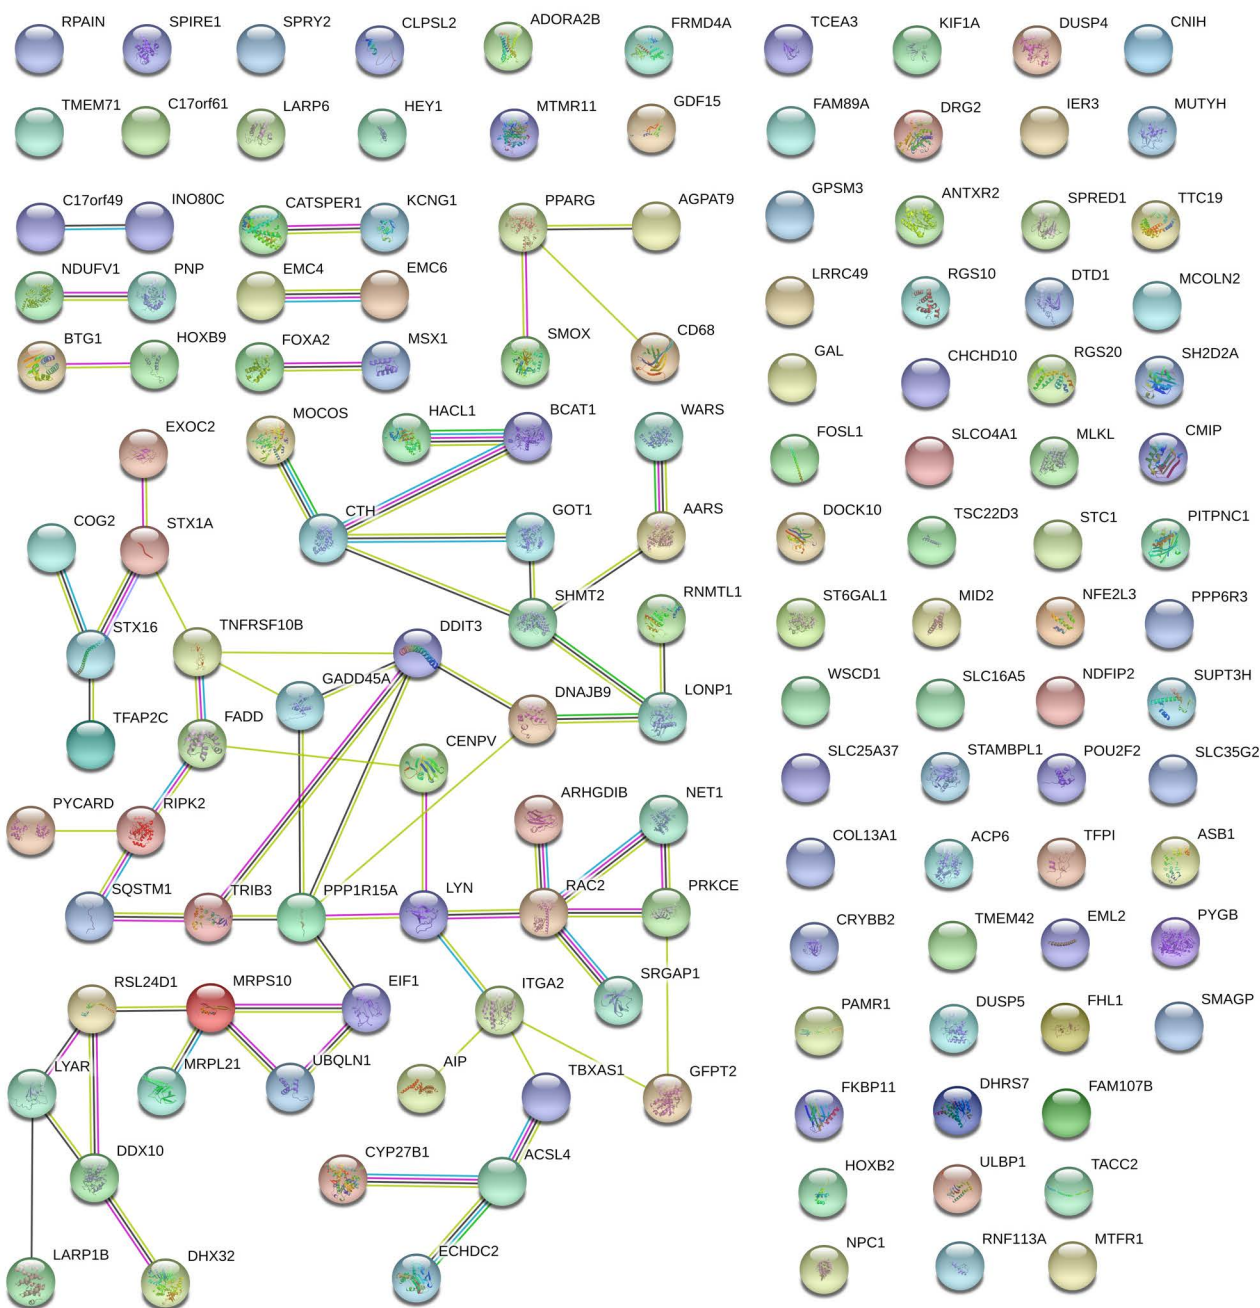

Supplement: jcav11p3623s1.pdf [file jcav11p3623s1.pdf]
